# Supplementary material
Source: PubMed Central journal article supplement (PMC5760343)
Supplement: NIHMS921965-supplement-1.pdf [file NIHMS921965-supplement-1.pdf]

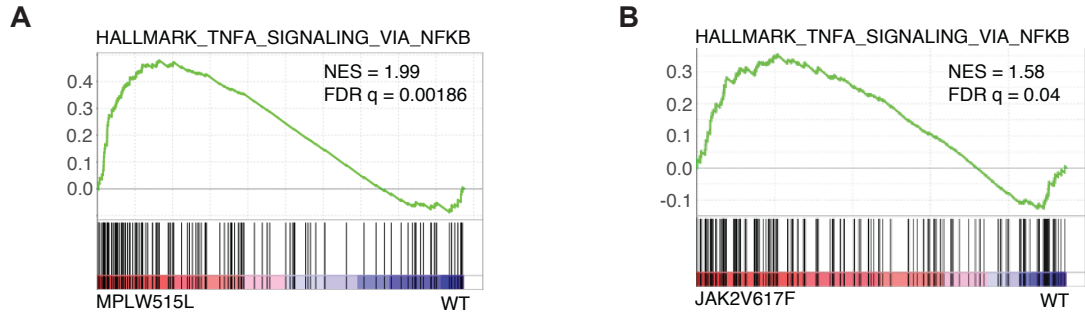

**Figure S1, related to Figure 1. TNF/NF- $\kappa$ B signaling axis in MF progenitors. A, B)** GSEA pathways analysis of H3K27ac marks at enhancers from MPLW515L-positive (**A**) and JAK2V617F-positive (**B**) MEPs. NES, normalized enrichment score; FDR, false-discovery rate.

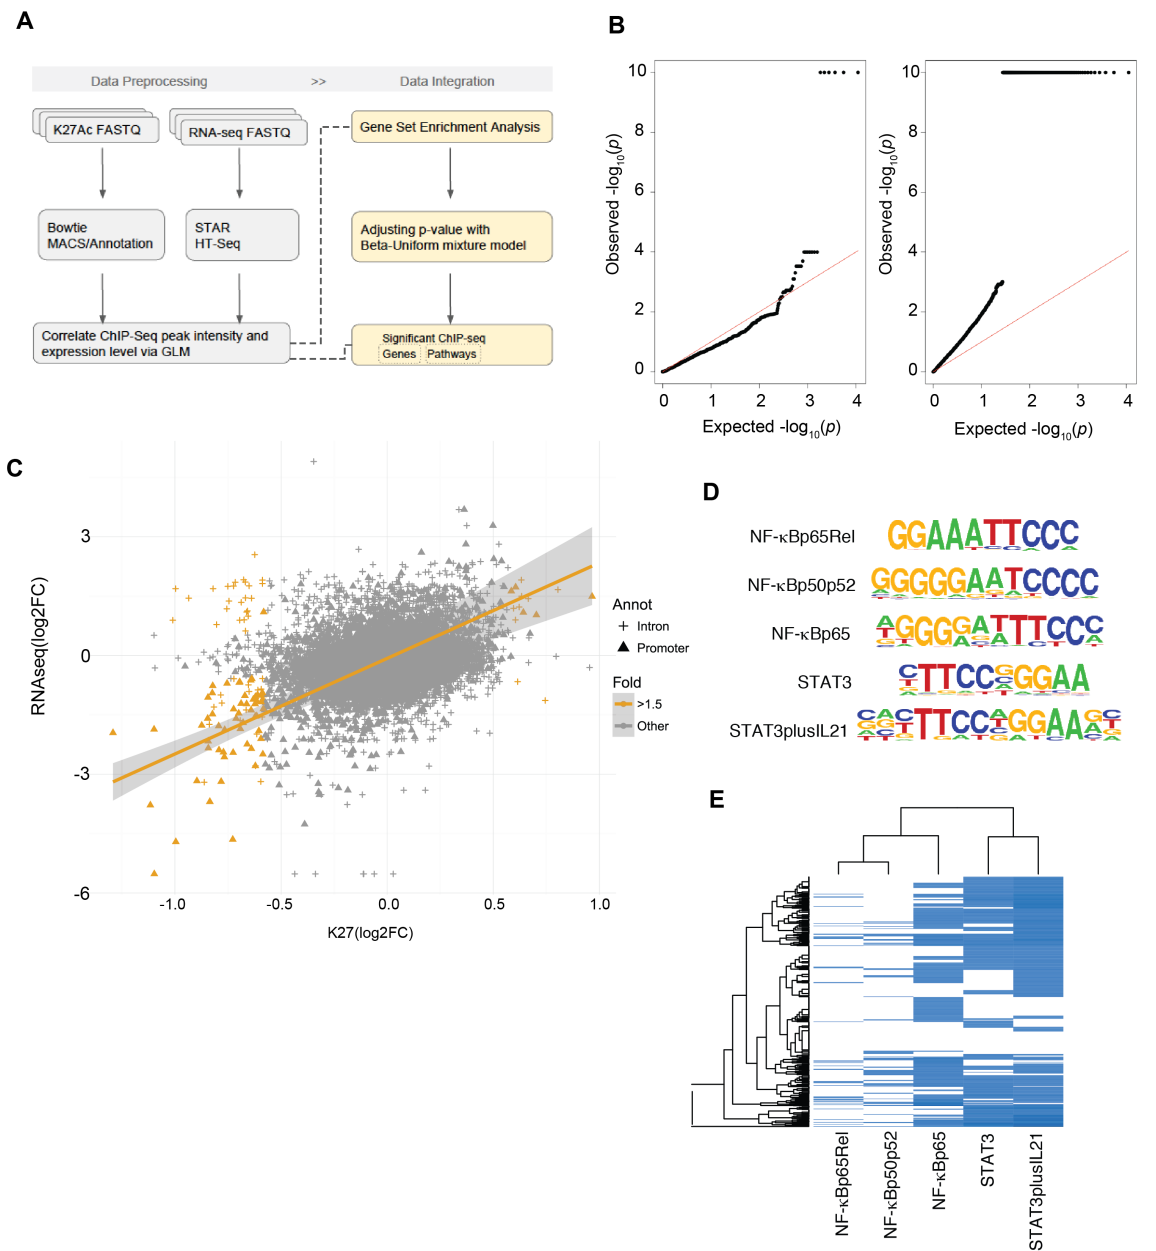

**Figure S2, related to Figure 2. Integrative analysis of ChIP-seq and gene expression data. A)** RNA-seq and ChIP-seq data analysis workflow. GLM, generalized linear model. **B)** QQ plot of GSEA p values. **C)** Differentially expressed genes (log<sub>2</sub>-fold change) are plotted versus differentially enriched H3K27ac peaks (log<sub>2</sub>-fold change). K27, H3K27ac; log<sub>2</sub>FC, log<sub>2</sub>-fold change. **D)** DNA motifs used for transcription factor binding analysis. **E)** Analysis of the STAT3 (STAT3, STAT3plusIL21) and NF-κB (NF-κBp65Rel, NF-κBp50p52, and NF-κBp65) transcription factor bindings sites in the regulatory regions of the DEGs in JAK2V617F-positive MEPs.

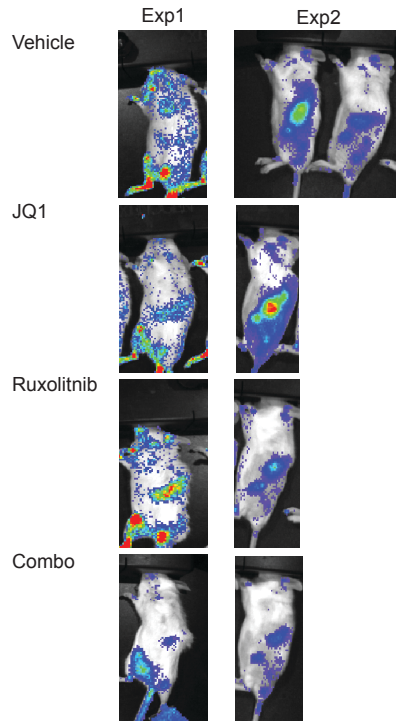

**Figure S3, related to Figure 3. BET and JAK inhibition alone and in combination reduces NF- $\kappa$ B pathway activation *in vivo*.** *In vivo* BLI of MPLW515L-diseased mice treated with ruxolitinib (60 mg/kg, BID), JQ1 (50 mg/kg, QD), ruxolitinib plus JQ1, or vehicle for three days. Mice were imaged 2-3 hours after last drug administration. Images shown are from two independent experiments.

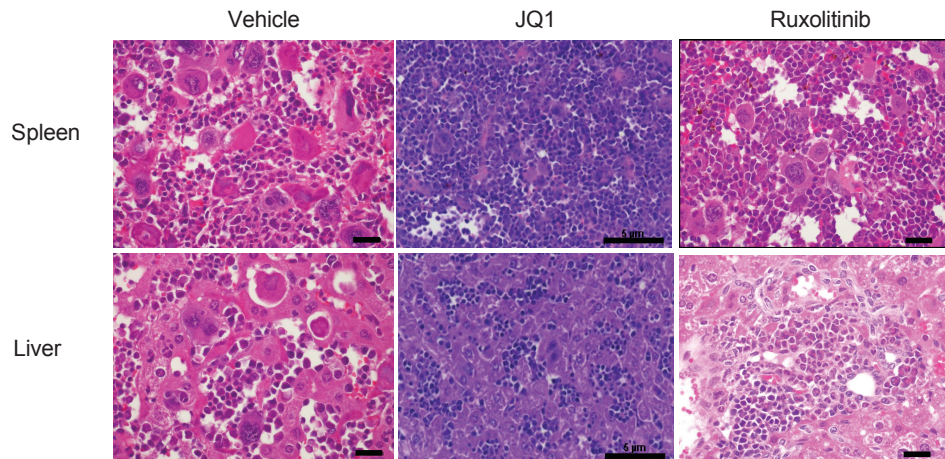

**Figure S4, related to Figure 4. BET and JAK inhibition alone and in combination reduces EMH in liver and spleen of MPLW515L-diseased mice.** Representative images showing H&E stain of spleen and liver from MF mice treated for 21 (vehicle and JQ1) or 28 (ruxolitinib) days. Data shown are representative of 4-5 mice per group. Scale bar, 10  $\mu$ M (vehicle and ruxolitinib), 5  $\mu$ M (JQ1).

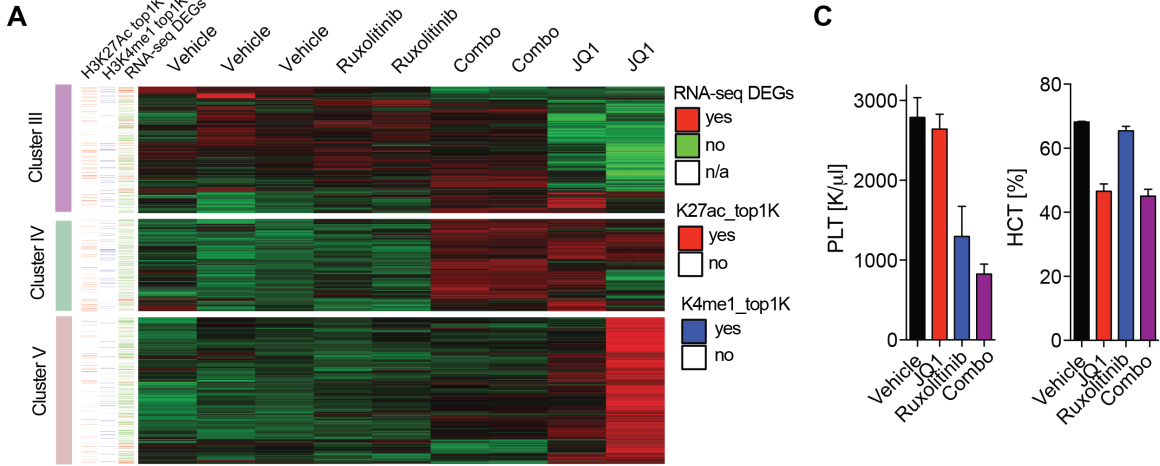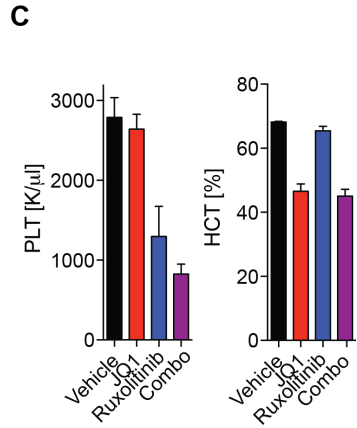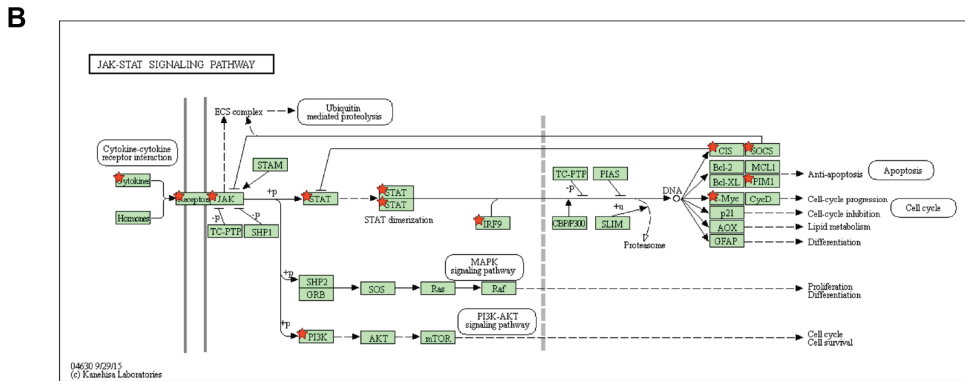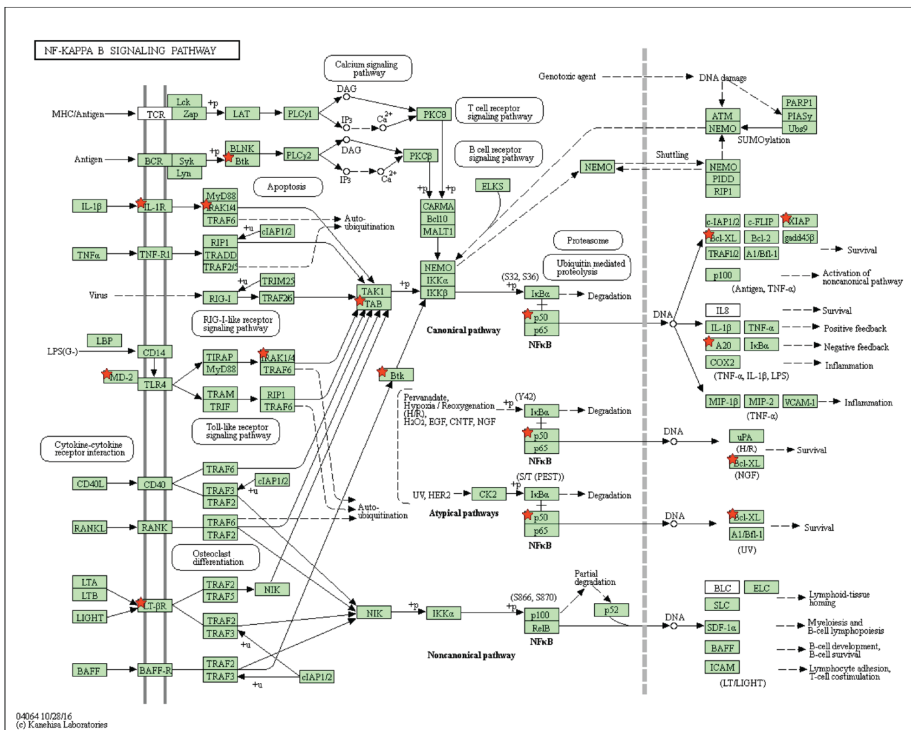

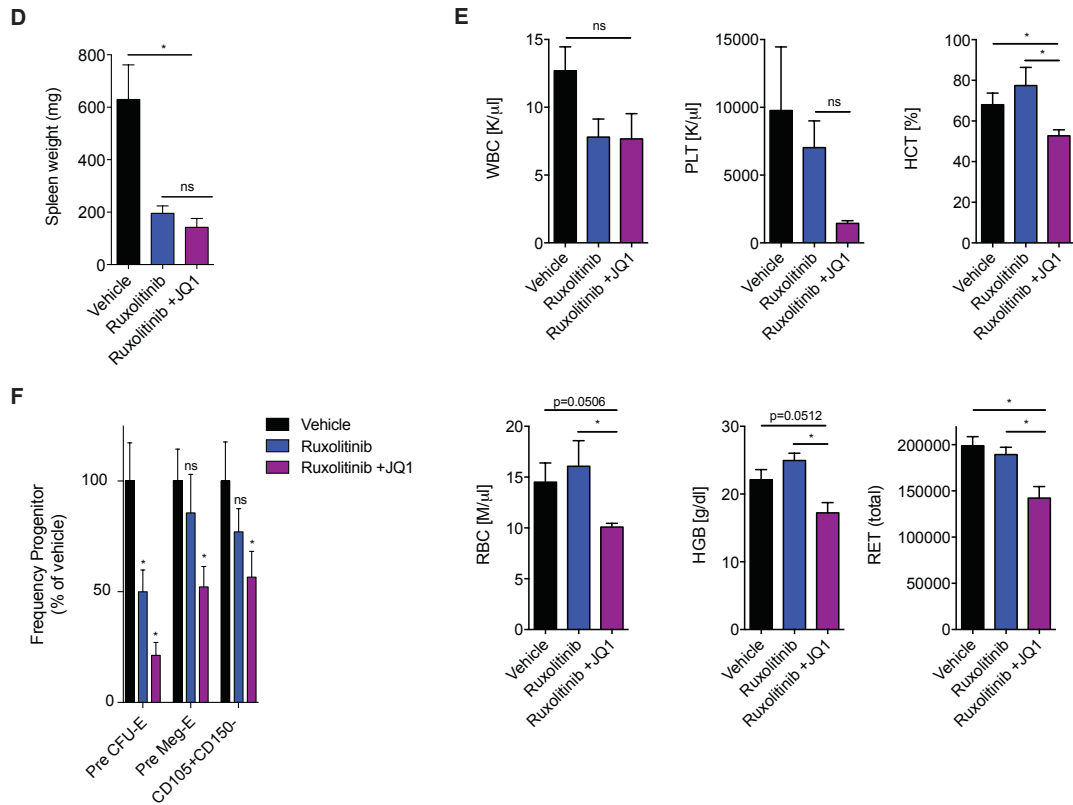

**Figure S5, related to Figure 5. Combined BET and JAK inhibition abrogates murine MPN.** **A)** Heatmap depicting RNA-sequencing data for indicated samples. Data from biological duplicates or triplicates are shown. Color code indicates whether a gene is differentially expressed (DEGs) or contains an H3K27ac or H3K4me1 peak belonging to the top 1000 significant differential peaks (K27ac\_top1K or K4me1\_top1K, respectively). **B)** Representation of the KEGG JAK/STAT and NF- $\kappa$ B Signaling Pathway, showing differentially regulated genes between MF and control cells (red stars). **C)** PLT counts (K/ $\mu$ l) and HCT levels (%) of MF mice treated as indicated for 21 days. **D)** Bar graph showing spleen weights of primary JAK2V617F mice (2-4 months) treated with vehicle, ruxolitinib, or combination for 28 days. **E)** White blood cell counts (WBC, K/ $\mu$ l), platelet counts (PLT, K/ $\mu$ l), hematocrit levels (HCT, %), red blood cell counts (RBC, M/ $\mu$ l), hemoglobin level (HGB, g/dl) and reticulocyte count (RET, total count) of primary JAK2V617F mice treated with vehicle, ruxolitinib, or ruxolitinib plus JQ1 for 28 days. **F)** Flow analysis of megakaryocytic-erythroid progenitors (Lin<sup>-</sup>Sca1<sup>-</sup>cKit<sup>+</sup>CD41<sup>-</sup>FcgR<sup>-</sup>) in the bone marrow from JAK2V617F mice treated as indicated for 28 days. Frequency of progenitors in control mice represents 100%. Data shown in this figure are from two different experiments with a total of n=4-5 mice/group. ns= not significant, \*, p value <0.05. Bar graphs represent mean  $\pm$  S.E.M.

**Table S4, related to Figure 5. GO term enrichment analysis using DAVID**

| <b>Cluster</b> | <b>Term</b>                                             | <b>Benjamini</b> |
|----------------|---------------------------------------------------------|------------------|
| I              | cell division                                           | 4.80E-17         |
|                | DNA repair                                              | 4.20E-14         |
|                | RNA splicing                                            | 5.10E-13         |
|                | NK/NK-kappaB signaling                                  | 3.90E-10         |
|                | tumor necrosis factor-mediated signaling pathway        | 2.70E-04         |
|                | MAPK cascade                                            | 7.80E-03         |
| II             | mitotic cell cycle                                      | 8.90E-01         |
|                | cell division                                           | 7.30E-02         |
|                | RNA splicing                                            | 5.20E-01         |
| III            | cytokine-mediated signaling pathway                     | 7.20E-02         |
|                | type I interferon signaling pathway                     | 1.80E-01         |
|                | positive regulation of NF-kappaB import into nucleus    | 2.70E-01         |
|                | regulation of small GTPase mediated signal transduction | 1.70E-01         |
|                | regulation of dendritic cell cytokine production        | 7.20E-01         |
|                | positive regulation of chemokine production             | 7.30E-01         |
|                | I-kappaB phosphorylation                                | 9.40E-01         |
| IV             | innate immune response                                  | 1.80E-01         |
|                | MAPK cascade                                            | 9.00E-01         |
|                | NIK/NF-kappaB signaling                                 | 1.50E-01         |
|                | tumor necrosis factor-mediated signaling pathway        | 3.10E-01         |

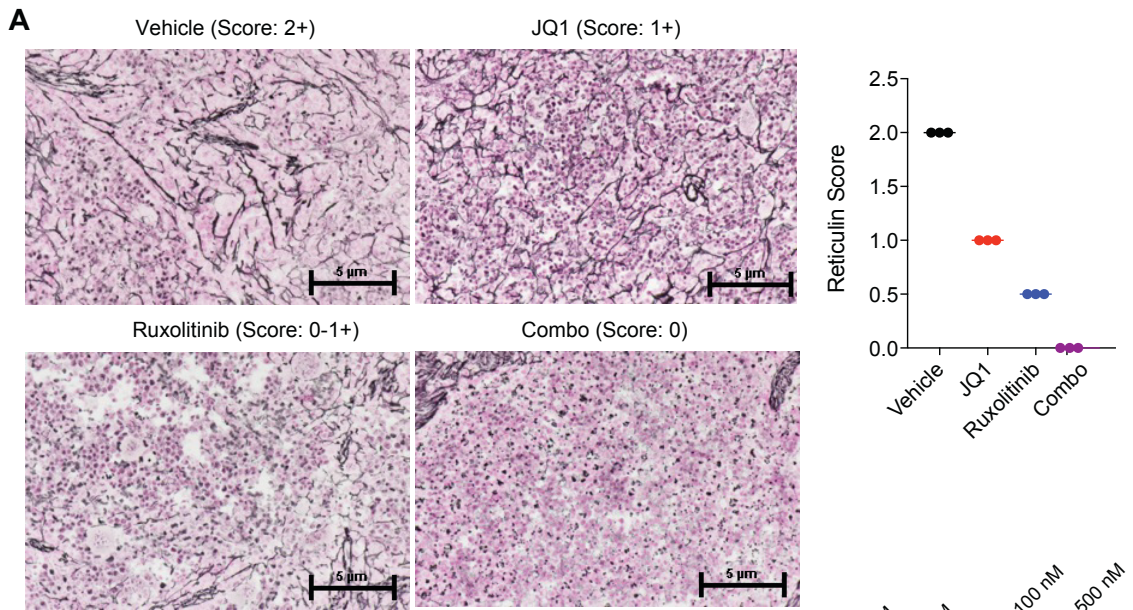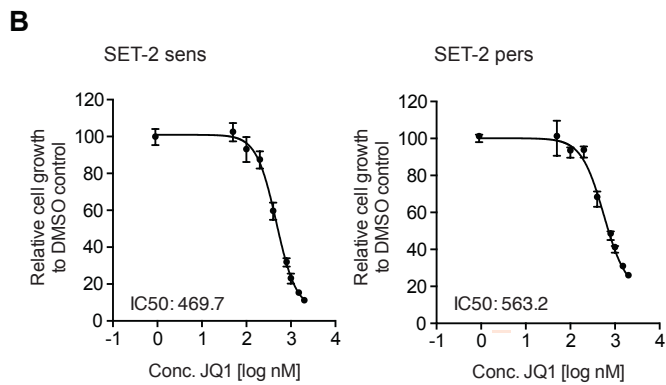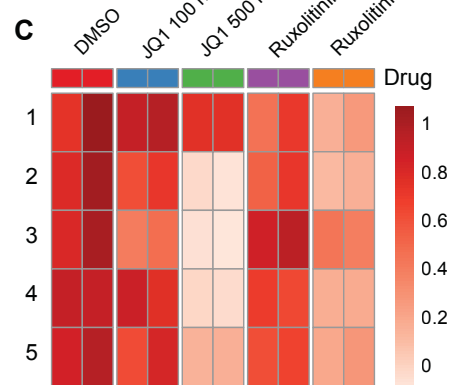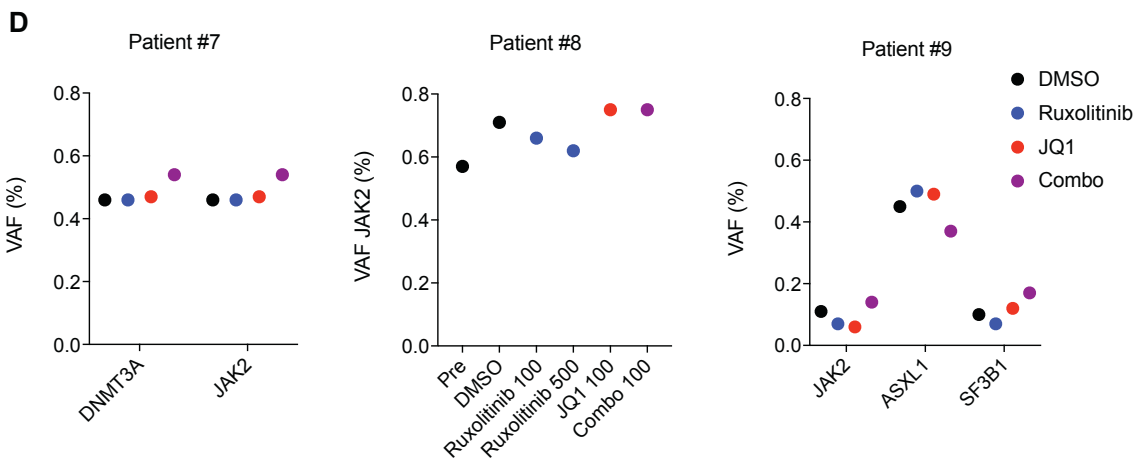



**Figure S6, related to Figure 6. SET-2 cells are sensitive to BET inhibitor JQ1. A)** *Left:* Representative images of the degree of fibrosis in the spleen of MF mice treated as indicated. *Right:* Scoring of the degree of fibrosis in the spleen of MF mice treated as indicated. n=3 mice per group. Scale bar, 5  $\mu$ M. **B)** SET-2 cells were treated with increasing concentrations of JQ1 for 48 hours. Data are representative of three independent experiments. IC50, drug concentration to reduce cell growth by 50 %. sens, SET-2 parental cells not previously exposed to ruxolitinib; pers, ruxolitinib-persistent SET-2 cells. Graphs represent mean values  $\pm$  S.E.M. **C)** CFU assays of CD34-positive cells from MPN patients. Each row represents the data from one patient with colony counts normalized to DMSO control wells. n=2 wells/condition are shown. Genetic information for each patient is listed in **Table S5**. **D)** Variant allele frequencies (VAF, %) from propagated colonies of 3 MPN patients post exposure to different drug conditions are shown.

**Table S5, related to Figure 6. Information for patient samples used for CFU assays**

| No | Disease         | Gender | Age | Mutations                                                                                                                                    | VAF                      |
|----|-----------------|--------|-----|----------------------------------------------------------------------------------------------------------------------------------------------|--------------------------|
| 1  | MF              | M      | 42  | JAK2 (NM_004972) exon 14 p.V617F (c.1849G>T)<br>DNMT3A N802S<br>SF3B1 K666N<br>TP53 V172A                                                    | N/A<br>N/A<br>N/A<br>N/A |
| 2  | MF              | F      | 70  | JAK2 (NM_004972) exon 14 p.V617F (c.1849G>T)                                                                                                 | 0.49                     |
| 3  | MF              | F      | 55  | JAK2 (NM_004972) exon 14 p.V617F (c.1849G>T)<br>CBL splicing exon 16<br>del120q                                                              | N/A<br>N/A<br>N/A        |
| 4  | MF              | M      | 77  | JAK2 (NM_004972) exon 14 p.V617F (c.1849G>T)                                                                                                 | N/A                      |
| 5  | post ET-MF      | F      | 76  | CALR exon 9                                                                                                                                  | N/A                      |
| 6  | PV (high-grade) | F      | 57  | EZH2 (NM_004456) exon12 p.R475T (c.1424G>C)<br>JAK2 (NM_004972) exon14 p.V617F (c.1849G>T)                                                   | N/A<br>0.25              |
| 7* | PV              | M      | 82  | DNMT3A (NM_022552) exon23 p.R882H (c.2645T>A)<br>JAK2 (NM_004972) exon14 p.V617F (c.1849G>T)                                                 | N/A<br>0.737             |
| 8* | MF              | F      | 69  | JAK2 (NM_004972) exon 14 p.V617F (c.1849G>T)<br>RUNX1 (NM_001754) exon 5 p.F163L (c.487T>C)                                                  | 0.83<br>0.15             |
| 9* | MF              | F      | 64  | JAK2 (NM_004972) exon 14 p.V617F (c.1849G>T)<br>DNMT3A (NM_022552) exon 20 p.K783E (c.2347A>G)<br>SF3B1 (NM_012433) exon 2 p.D34N (c.100G>A) | 0.23<br>0.06<br>0.24     |
| 10 | MF              | M      | 40  | PHF6 (NM_032458) exon 6 p.H149L (c.446A>T)                                                                                                   | N/A                      |

\* Patients used for detailed mutational analysis

Table S6, related to Figure 6. Mutational profiling results using a targeted myeloid-disease :

| Patient ID | Treatment  | αGENE         | CHR         | START     | END       | REF     | ALT | TRANSCRIPT  | RNA_CHANGE | cDNA_CHANGE | PROTEIN_CHANGE | EFFECT               | TARGET_VAF           | TARGET_DEPTH | NORMAL_VAF | NORMAL_DEPTH |     |
|------------|------------|---------------|-------------|-----------|-----------|---------|-----|-------------|------------|-------------|----------------|----------------------|----------------------|--------------|------------|--------------|-----|
| 7          | DMSO       | <i>DNMT3A</i> | 2           | 25457242  | 25457242  | C       | T   | CCDS33157.1 | r.2983g>a  | c.2645G>A   | p.R882H        | non_synonymous_codon | 0.46                 | 1223         | 0          | 765          |     |
|            | Rux 100nM  | <i>DNMT3A</i> | 2           | 25457242  | 25457242  | C       | T   | CCDS33157.1 | r.2983g>a  | c.2645G>A   | p.R882H        | non_synonymous_codon | 0.46                 | 885          | 0          | 765          |     |
|            | JQ1 100nM  | <i>DNMT3A</i> | 2           | 25457242  | 25457242  | C       | T   | CCDS33157.1 | r.2983g>a  | c.2645G>A   | p.R882H        | non_synonymous_codon | 0.47                 | 891          | 0          | 765          |     |
|            | Combo 100n | <i>DNMT3A</i> | 2           | 25457242  | 25457242  | C       | T   | CCDS33157.1 | r.2983g>a  | c.2645G>A   | p.R882H        | non_synonymous_codon | 0.54                 | 692          | 0          | 765          |     |
|            | DMSO       | <i>JAK2</i>   | 9           | 5073770   | 5073770   | G       | T   | CCDS6457.1  | r.2343g>u  | c.1849G>T   | p.V617F        | non_synonymous_codon | 0.55                 | 945          | 0          | 841          |     |
|            | Rux 100nM  | <i>JAK2</i>   | 9           | 5073770   | 5073770   | G       | T   | CCDS6457.1  | r.2343g>u  | c.1849G>T   | p.V617F        | non_synonymous_codon | 0.49                 | 720          | 0          | 841          |     |
|            | JQ1 100nM  | <i>JAK2</i>   | 9           | 5073770   | 5073770   | G       | T   | CCDS6457.1  | r.2343g>u  | c.1849G>T   | p.V617F        | non_synonymous_codon | 0.56                 | 727          | 0          | 841          |     |
|            | Combo 100n | <i>JAK2</i>   | 9           | 5073770   | 5073770   | G       | T   | CCDS6457.1  | r.2343g>u  | c.1849G>T   | p.V617F        | non_synonymous_codon | 0.54                 | 612          | 0          | 841          |     |
|            | 8#         | Before platin | <i>JAK2</i> | 9         | 5073770   | 5073770 | G   | T           | CCDS6457.1 | r.2343g>u   | c.1849G>T      | p.V617F              | non_synonymous_codon | 0.57         | 569        | 0            | 841 |
|            |            | DMSO          | <i>JAK2</i> | 9         | 5073770   | 5073770 | G   | T           | CCDS6457.1 | r.2343g>u   | c.1849G>T      | p.V617F              | non_synonymous_codon | 0.71         | 879        | 0            | 841 |
| Rux 100nM  |            | <i>JAK2</i>   | 9           | 5073770   | 5073770   | G       | T   | CCDS6457.1  | r.2343g>u  | c.1849G>T   | p.V617F        | non_synonymous_codon | 0.66                 | 740          | 0          | 841          |     |
| Rux 500nM  |            | <i>JAK2</i>   | 9           | 5073770   | 5073770   | G       | T   | CCDS6457.1  | r.2343g>u  | c.1849G>T   | p.V617F        | non_synonymous_codon | 0.62                 | 690          | 0          | 841          |     |
| JQ1 100nM  |            | <i>JAK2</i>   | 9           | 5073770   | 5073770   | G       | T   | CCDS6457.1  | r.2343g>u  | c.1849G>T   | p.V617F        | non_synonymous_codon | 0.75                 | 828          | 0          | 841          |     |
| Combo 100n |            | <i>JAK2</i>   | 9           | 5073770   | 5073770   | G       | T   | CCDS6457.1  | r.2343g>u  | c.1849G>T   | p.V617F        | non_synonymous_codon | 0.75                 | 726          | 0          | 841          |     |
| 9          | DMSO       | <i>JAK2</i>   | 9           | 5073770   | 5073770   | G       | T   | CCDS6457.1  | r.2343g>u  | c.1849G>T   | p.V617F        | non_synonymous_codon | 0.11                 | 961          | 0          | 841          |     |
|            | Rux 100nM  | <i>JAK2</i>   | 9           | 5073770   | 5073770   | G       | T   | CCDS6457.1  | r.2343g>u  | c.1849G>T   | p.V617F        | non_synonymous_codon | 0.07                 | 955          | 0          | 841          |     |
|            | JQ1 100nM  | <i>JAK2</i>   | 9           | 5073770   | 5073770   | G       | T   | CCDS6457.1  | r.2343g>u  | c.1849G>T   | p.V617F        | non_synonymous_codon | 0.06                 | 840          | 0          | 841          |     |
|            | Combo 100n | <i>JAK2</i>   | 9           | 5073770   | 5073770   | G       | T   | CCDS6457.1  | r.2343g>u  | c.1849G>T   | p.V617F        | non_synonymous_codon | 0.14                 | 790          | 0          | 841          |     |
|            | DMSO       | <i>ASXL1</i>  | 20          | 31023598  | 31023598  | C       | T   | CCDS13201.1 | r.3507c>u  | c.3083C>T   | p.S1028L       | non_synonymous_codon | 0.45                 | 1227         | 0          | 900          |     |
|            | Rux 100nM  | <i>ASXL1</i>  | 20          | 31023598  | 31023598  | C       | T   | CCDS13201.1 | r.3507c>u  | c.3083C>T   | p.S1028L       | non_synonymous_codon | 0.5                  | 1134         | 0          | 900          |     |
|            | JQ1 100nM  | <i>ASXL1</i>  | 20          | 31023598  | 31023598  | C       | T   | CCDS13201.1 | r.3507c>u  | c.3083C>T   | p.S1028L       | non_synonymous_codon | 0.49                 | 1125         | 0          | 900          |     |
|            | Combo 100n | <i>ASXL1</i>  | 20          | 31023598  | 31023598  | C       | T   | CCDS13201.1 | r.3507c>u  | c.3083C>T   | p.S1028L       | non_synonymous_codon | 0.37                 | 870          | 0          | 900          |     |
|            | DMSO       | <i>SF3B1</i>  | 2           | 198288627 | 198288627 | C       | T   | CCDS33356.1 | r.192g>a   | c.100G>A    | p.D34N         | non_synonymous_codon | 0.1                  | 1509         | 0          | 1341         |     |
|            | Rux 100nM  | <i>SF3B1</i>  | 2           | 198288627 | 198288627 | C       | T   | CCDS33356.1 | r.192g>a   | c.100G>A    | p.D34N         | non_synonymous_codon | 0.07                 | 1523         | 0          | 1341         |     |
|            | JQ1 100nM  | <i>SF3B1</i>  | 2           | 198288627 | 198288627 | C       | T   | CCDS33356.1 | r.192g>a   | c.100G>A    | p.D34N         | non_synonymous_codon | 0.12                 | 1458         | 0          | 1341         |     |
|            | Combo 100n | <i>SF3B1</i>  | 2           | 198288627 | 198288627 | C       | T   | CCDS33356.1 | r.192g>a   | c.100G>A    | p.D34N         | non_synonymous_codon | 0.17                 | 1147         | 0          | 1341         |     |

# Runx1 mutation not detected during mutational profiling of propagated colonies

\*ASXL1 mutation newly identified in this patient, DNMT3A mutation not detected during mutational profiling
